# 1 **Better together: a transboundary approach to brown bear monitoring in the** 2 **Pyrenees**

3 Blaise Piédallu (1) – Corresponding author

4 Pierre-Yves Quenette (2)

5 Ivan Afonso Jordana (3)

6 Nicolas Bombillon (2)

7 Adrienne Gastineau (2)

8 Ramón Jato (4)

9 Christian Miquel (5)

10 Pablo Muñoz (6)

11 Santiago Palazón (7)

12 Jordi Solà de la Torre (8)

13 Olivier Gimenez (1)

14 (1) CEFÉ, CNRSUMR 5175, Université de Montpellier, Université Paul-Valéry Montpellier,  
15 EPHE, 1919 Route de Mende, 34293 Montpellier Cedex 5, France

16 (2) Office National de la Chasse et de la Faune Sauvage, CNERA PAD-Equipe Ours, Impasse  
17 de la Chapelle, 31800 Villeneuve-de-Rivière, France

18 (3) Medi Ambient, Conselh Generau d’Aran, Plaça dera Libertat, 16, 25530 Vielha, Spain

19 (4) Departamento de Producción y Asistencias Técnicas, Sociedad Aragonesa de Getión  
20 Agroambiental, S. L. U., Ctra HUV-Fornillos, 22195 Fornillos de Apiés, Huesca, Spain

21 (5) Laboratoire d’Ecologie Alpine, CNRS UMR 5553, Université Joseph Fourier, BP 53, F-  
22 38041 Grenoble Cedex 9, France

23 (6) Jefe de la Sección de Hábitats, Gobierno de Navarra

24 (7) Fauna and Flora Service, Department of Territory and Sustainability. Dr. Roux, 80. 08017

25 Barcelona, Spain

26 (8) Unitat de Fauna, Departament de Medi Ambient, C/ Prat de la Creu 62-64, AD500 Andorra

27 la Vella, Principality of Andorra

28 Corresponding author personal information :

29 Centre d'Ecologie Fonctionnelle et Evolutive

30 1919 Route de Mende

31 34293 Montpellier Cedex 5

32 [blaise.piedallu@cefe.cnrs.fr](mailto:blaise.piedallu@cefe.cnrs.fr)

33 +334 67 61 33 14

## 34 **Abstract**

35 Human administrative borders have no effect on wild animals, and the vast home ranges of large carnivores  
36 often cause them to live simultaneously on the territory of two or more countries or jurisdictions with  
37 different management policies. Here, we investigate the importance of transboundary population monitoring  
38 using as a case study the Pyrenean brown bear population (*Ursus arctos*) that lives in France, Andorra and  
39 Spain. Using capture-recapture models and the Pollock's robust design, we estimated abundance and  
40 demographic parameters using data collected separately in France and Spain and a dataset gathered from  
41 joint monitoring on both sides of the border. As expected, the abundance estimates from French (from 11  
42 bears in 2008 to 13 in 2014) or Spanish (from 4 bears in 2008 to 9 in 2014) data only were lower than  
43 abundance obtained from both sides of the border (from 11 in 2008 to 18 in 2014). The joint monitoring  
44 dataset also highlighted the importance of individual detection heterogeneity that, if ignored, would lead to  
45 underestimation. Our results reinforce the importance of transboundary cooperation when dealing with  
46 animal populations with territory spanning two or more administrative jurisdictions for collecting reliable  
47 scientific data and providing relevant abundance estimation to take sound management decisions.

48 *Keywords: capture-recapture, elusive species, robust design, transboundary monitoring, Ursus arctos*

## 49 **Introduction**

50 Large carnivore populations in Europe are recovering from years of decrease after having been highly  
51 threatened or locally extinct, leading to larger population sizes and wider distributions (Chapron et al. 2014).  
52 These populations have large home ranges despite interspecific (Gittleman and Harvey 1982) or intraspecific  
53 (Mattisson et al. 2013; Nilsen et al. 2005) variations, and their recovery increases the likelihood of crossing  
54 the administrative border between two countries, or between two distinct jurisdictions within the same  
55 country. Therefore, the same large carnivore population may overlap several territories where the inhabitants  
56 have different or conflicting opinions on their monitoring or management (Bischof and Swenson 2012; Bull  
57 et al. 2009; Piédallu et al. 2016).

58 The conservation status of a population is commonly estimated based on its abundance and distribution,  
59 which in turn may help to assess its viability and to predict its range in the future. However, while  
60 transboundary large carnivore populations are extremely common, transboundary conservation policies are

61 still rarely implemented (Gervasi et al. 2015; Linnell and Boitani 2012; Trouwborst 2010). Moreover,  
62 population monitoring is usually performed independently between the countries on one side and the other of  
63 the boundary. These countries in turn perform abundance estimation based solely on the data gathered on  
64 their own territory, leading to a discrepancy between management policy and ecological reality (Linnell and  
65 Boitani 2012; Trouwborst 2010). This approach might cause significant errors when trying to assess the  
66 abundance of a species, due to the possibility for a single animal to be seen across different territories  
67 (Bischof et al. 2016).

68 Here, we aimed at illustrating the value of collaborative monitoring at a transboundary scale, using brown  
69 bears (*Ursus arctos*) in the Pyrénées as a case study. Brown bears are widely distributed in the Northern  
70 hemisphere, being spread over North America (Waits et al. 1998), Europe (Swenson et al. 2011), and Asia  
71 (Hirata et al. 2013). The species as a whole is not endangered. However, some populations can be both small  
72 and isolated from others, leading to an important risk of local extinction (Linnell et al. 2008; Swenson et al.  
73 2011). Among those endangered populations is the Pyrenean brown bear population, which resides in the  
74 mountains between Southwestern France and Northeastern Spain. Despite being reinforced by the  
75 reintroduction of individuals from Slovenia in 1996-97 (3 bears) and 2006 (5 bears) with another one  
76 scheduled for 2016 (1 bear), its viability is still considered to be low (Chapron et al. 2010) due to its small  
77 size, its fragmentation in different cores, and heavy inbreeding that might negatively impact its growth in a  
78 medium- or long-term future. Moreover, there are conflicting attitudes among local inhabitants over bear  
79 presence (Piédallu et al. 2016).

80 Combining data collected through camera trapping, systematic search-effort protocols and opportunistic  
81 observations in Spain and France, we estimated abundance and demographic parameters for the Pyrenean  
82 brown bear population using Pollock's robust design capture-recapture models (Kendall et al. 1997). We  
83 reproduced the same analyses mimicking a lack of collaboration between the two countries and compared the  
84 results. Overall, we demonstrate the benefits of cooperation across the border in the monitoring and  
85 management of a large carnivore population.

## 86 **Material & Methods**

### 87 1. Study area and bear population

88 This study was performed in the Pyrenees Mountains, on both sides of the border, which included  
89 Southwestern France, the North of the Spanish Autonomous communities of Catalonia, Aragon and Navarre,  
90 and the principality of Andorra (Figure 1). Bears that live in the Pyrenees descend from individuals that were  
91 translocated here from Slovenia in 1996-97 (2 females and 1 male) and 2006 (4 females and 1 male),  
92 although a hybrid between a Slovenian bear and a now-deceased Pyrenean female is still alive. The  
93 relocations were performed to save the population that was in critical danger of extinction in 1995, with only  
94 5 individuals remaining, including a single adult female. The current population is split in two unconnected  
95 population cores(Camarra et al. 2015): one in the Western Pyrenees, over France, Aragon and Navarre, and  
96 one in Central-Eastern Pyrenees, over France, Catalonia, Aragon and Andorra.

## 97 2. Data collection and monitoring

98 Systematic monitoring was performed in France, Catalonia and Andorra from 2008 to 2014, consisting in  
99 fixed itineraries along which agents of governmental wildlife looked for bear tracks with help on the French  
100 side of the Pyrenees from volunteers of the Brown Bear Network, whose members include 135 professional  
101 members (from various agencies) and 228 amateur members (who are not affiliated to any agency). In  
102 Catalonia, two teams of 10 professional members handle systematic monitoring with help from Forestry  
103 Agents. Visits of these itineraries were repeated at regular time intervals between April and November, with  
104 at least a monthly visit (Figure 1). Due to the very low number of bears on their territories, there was no  
105 systematic monitoring in Aragon and Navarre. In all areas, data was also obtained through opportunistic  
106 means, which included all sightings or tracks found outside of systematic monitoring and validated by the  
107 local agencies, or damages caused on livestock (sheep in particular) or beehives. Since 2008, both countries  
108 have worked to standardize their monitoring protocols in the framework decided by the Transborder  
109 Monitoring Group for Bears in Pyrenees (GSTOP).

110 The most common bear tracks included hair samples (with 4-5 hair traps being scattered along the itineraries  
111 to improve the chances of getting a sample), scats, footprints, claw marks, photographs, films, attacks on  
112 livestock, sightings and opened ant-hills. Hair traps were added on trees along the itineraries to increase the  
113 chances to obtain hair samples. We discarded the tracks that did not allow the identification of an individual,  
114 mostly due to a lack of a good enough genetic sample. We also paid a particular attention to estimate the

115 interval in which the bear might have left the track (see Supplementary materials). Genetic samples (hairs  
116 and faeces) were analyzed using a Polymerase Chain Reaction (PCR) multitube approach with four repeats  
117 for each sample to avoid the risk of misidentification due to the low DNA quantity of some hair samples  
118 (Miquel et al. 2006; Taberlet et al. 1997). 13 microsatellites markers and 1 marker for sex were targeted by  
119 the PCR in order to identify the bear individuals. The results were then aggregated between all sources.

120 We assigned to each individual its age class at first capture (Cub: up to 1 year old, Juvenile: up to 3 years  
121 old, Adult: 4 years old and more) and its gender. The population was assumed geographically closed, i.e. no  
122 emigration or immigration between this population and another one outside the Pyrenees.

### 123 3. Abundance estimation

124 We used the Pollock's robust design (Kendall et al. 1997) to estimate abundance while accounting for  
125 imperfect detection of individuals and temporary emigration. The robust design approach uses repeated  
126 captures in a short timeframe, called secondary occasions, within a single time step (a so-called primary  
127 occasion). The population is considered to be closed (without demographic processes such as births, deaths,  
128 immigrations and emigrations) between two consecutive secondary occasions, hence allowing the robust  
129 estimation of abundance corrected for imperfect detection, and open (with births, deaths, emigrations and  
130 immigrations) between two consecutive primary occasions. In this study, we used years as primary occasions  
131 of capture (7 in total, from 2008 to 2014) and the months from May to September as secondary occasions (5  
132 in total). We chose these secondary occasions because no births occur in this time interval, and we did not  
133 include the first months of the year because very young cubs have a high risk of dying.

134 We built three capture-recapture datasets: one for French data (including Andorra), one for Spanish data  
135 (Catalonia, Aragon, Navarre), and one for the Combined (France and Spain) data. We tested three possible  
136 types of temporary emigration: no emigration, a random emigration (where the probability of being a  
137 temporary emigrant only depends on the status of the individual at a given capture occasion) and a  
138 Markovian emigration (where the probability of being a temporary emigrant depends on the status of the  
139 individual at a given time step and at the previous time step). We tested 4 possible effects on survival: no  
140 effect, a sex effect, an age effect, and an additive effect of sex and age. Finally, 6 possible effects on  
141 detection were considered: no effect, a sex effect, a time effect (where the probability of detection changed

142 between primary occasions – years, in our study), a mixture effect (with two distinct classes or individuals to  
143 account for detection heterogeneity, e.g. Cubaynes et al. (2010)), and the additive effects of sex and time and  
144 sex and mixture. In total, we tested 72 different models (Supplementary materials).

145 We used the Akaike Information Criterion corrected for small sample size (AICc) to perform model selection  
146 (Burnham and Anderson 2002). For each dataset (France, Spain, Combined), we kept the models with a  
147 AICc weight  $> 0.01$ . We also model-averaged parameter estimates to account for uncertainty in selecting one  
148 single ‘best’ model. To obtain 95% confidence intervals on abundance, we used a non-parametric bootstrap  
149 in which individual capture histories from each dataset were resampled with replacement a hundred times  
150 (Buckland et al. 1997).

151 We used the program MARK (White and Burnham 1999) called from software R (RCoreTeam 2013) with  
152 the ‘RMark’ package (Laake 2013).

## 153 **Results**

### 154 1. Descriptive statistics

155 7517 bear tracks were gathered in the Pyrenees between 2008 and 2014. The number of tracks that were  
156 usable in a robust design framework for the French, Spanish and Combined dataset by both being accurate  
157 enough and collected between May and September (see Supplementary data) is shown in Table 1, and  
158 amounted for 15 to 17% of the total tracks.

### 159 2. Model selection with the French dataset

160 The models that were selected for the French dataset mostly included a mixture effect on detection (Table  
161 2A), whether alone or with an additive effect of sex. Survival was linked either to no effect, or to an effect of  
162 sex. However, no specific type of emigration (none, random or Markovian) was preferentially selected. The  
163 three best models (AICc weight  $> 0.1$ ) included a sex effect along with individual heterogeneity on detection,  
164 and no effect on survival. No time effect on detection was found in the best models, and only the 12<sup>th</sup> best  
165 had an age effect on survival.

### 166 3. Model selection with the Spanish dataset

167 All models selected for the Spanish dataset included emigration, whether it was random or Markovian (Table  
168 2B), with the four best-ranked models having a random emigration. Models without emigration had a  
169 significantly lower weight. In contrast with the French dataset, the heterogeneity of detection (mixture effect)  
170 was seldom kept in the best models. Instead, most of the best models either had no effect or a sex effect for  
171 both survival and detection. The four best models (AICc weight >0.08) had a random emigration, and either  
172 no effect of a sex effect on both survival and detection.

#### 173 4. Model selection with the Combined dataset

174 Like in the French dataset, all the best models for the Combined dataset had a mixture effect on detection,  
175 whether it was alone or with an additive effect of sex (Table 2C). No clear pattern emerged for emigration,  
176 although the models with Markovian emigration tended to have a lower weight. The results were similarly  
177 contrasted for the effects on survival, with sex being kept in 8 of the 15 models and age in 5 of 15.

#### 178 5. Abundance estimates

179 In Spain, population increased to stabilize around 10 individuals, but showed a steep fall in 2013 before  
180 recovering in 2014 (Figure 2), which may indicate individuals that were temporarily unavailable. The French  
181 dataset pictured a very small increase between 2008 and 2014. The Combined dataset showed a trend similar  
182 to the Spanish dataset, with an increase between 2008 and 2014 and a temporary fall in 2013 mostly due to  
183 the lack of individuals detected on the Spanish side of the Pyrenees.

#### 184 6. Demographic parameter estimates

185 The survival estimates were higher in France than in Spain (Table 3). There was a notable difference  
186 between male and female survival in the Combined dataset ( $F = 0.81 \pm 0.051$ ,  $M = 0.933 \pm 0.041$ ). In the  
187 France and Combined datasets, two classes of individuals were identified detection-wise, with one class  
188 being easily detected (~0.7-0.8) and one being harder to detect (~0.3-0.4). In both cases, the detection  
189 probability of females ended up being slightly inferior to the detection probability of males.

190 In the Spain dataset, emigration was much higher than in the other datasets. This might be explained by the  
191 very few individuals found in 2013 that were probably treated by the models as temporary emigrating.  
192 Moreover, all models selected for the Spain dataset included a random or Markovian emigration, while the



193 France and Combined datasets also selected models with no emigration, which might have lowered the  
194 estimated values when averaged.

## 195 **Discussion**

### 196 1. Abundance and heterogeneity in the detection process

197 The results for the French and Combined datasets highlighted two classes of individuals with significantly  
198 different detection. A previous study on wolves highlighted the importance of individual detection  
199 heterogeneity (IDH) when estimating abundance of large carnivore populations (Cubaynes et al. 2010). IDH  
200 in the Pyrenean brown bears might stem from intraspecific home range disparities (McLoughlin et al. 2000)  
201 making it more likely to find tracks of individuals who move a lot. The individual that was detected the most  
202 often, Pyros, is also the male with the highest reproductive success, and the three most commonly seen males  
203 (Pyros, Balou and Nere) were the three oldest living males in 2014. Another factor that might cause IDH is  
204 the efficiency of human agents when looking for bear tracks. Some Pyrenean bears display a stable spatial  
205 behavior over the years (Camarra et al. 2015), making their movements predictable in time. The personality  
206 differences displayed by bears (Fagen and Fagen 1996) might allow the agents to become better at finding  
207 tracks.

### 208 2. Sex and age effect on survival

209 A result that was consistent in all datasets was the lack of an age effect on survival. This is unexpected since  
210 young bears generally suffer from higher mortality rates (Bunnell and Tait 1985). However, because our  
211 analysis only included data ranging from May to September, we excluded the first four or five months of life  
212 for the bear cubs, during which their survival rate is at its lowest, meaning that bear cub deaths might have  
213 simply gone unnoticed due to the absence of the cubs from the dataset.

214 The presence of an effect of sex on survival, with higher mortality rates for females, seemed to contradict a  
215 previous study performed on grizzly bears where mortality was higher among males (McLellan et al. 1999).  
216 However, in this study, hunting explained the bias towards male mortality, since death from natural causes  
217 was more common among females. Because bear hunting is banned in the Pyrenees, the results between the  
218 two studies are actually consistent.

219 3. Estimates of the demographic parameters

220 Female bears survival in the Combined dataset was consistent with previous studies performed in other  
221 populations (De Barba et al. 2010; Garshelis et al. 2005; Wielgus and Bunnell 1994). Male bears survival in  
222 the same dataset was consistent with a previous study on a population without hunting pressure (De Barba et  
223 al. 2010). The emigration rate was significantly higher when using only the Spanish dataset compared to the  
224 French and Combined datasets, which could indicate that bears travel more from the Spanish to the French  
225 side of the Pyrenees. This important emigration rate on the Spanish side might also result from demographic  
226 stochasticity, stemming from the small size of the population and the very low number of individuals  
227 identified in Spain in 2013.

228 4. Robust design as a tool to estimate population size for cryptic species

229 Rare populations can either be defined by the low number of individuals, or by the fact that the population  
230 belongs to elusive, hard-to-observe species with large home ranges and low density (McDonald 2004). The  
231 Pyrenean brown bear population falls under both cases, and as such estimating its demographic parameters is  
232 made even more difficult. We confirmed however that robust design capture-recapture models allowed  
233 estimating several population parameters (Smith et al. 2013). In our case, the robust design study was  
234 combined with the use of multiple data sources (Boulangier et al. 2008; Gervasi et al. 2012) to obtain enough  
235 captures so we could build capture-recapture datasets with a sufficient number of observations to be  
236 exploited.

237 Abundance estimates were different from those calculated yearly by the GSTOP, which found a significant  
238 increase in the minimal population size between 2008 and 2014, going from 17 to 31 individuals (Camarra et  
239 al. 2015). This discrepancy can be explained by the method used by the agencies, which use both a Minimal  
240 Kept Population Size (EMR) and a Minimal Detected Population Size (EMD). Every year, the EMD can be  
241 used to correct the previous year's EMR if some bears were not detected, due to the fact that the population  
242 is assumed geographically closed. In comparison, our robust design framework includes temporary  
243 emigration, which means that a bear that is not found during an entire year will not be included in the total  
244 population size. Moreover, to use the robust design framework, we excluded tracks that were difficult to  
245 date, and those that fell outside of the secondary occasions (May to September), which left some individuals

246 identified by the GSTOP (Camarra et al. 2015) out of our database (see Supplementary materials). Agency  
247 estimates performed so far always included the individuals that were found dead in their yearly counts  
248 (Camarra et al. 2015), while a robust design model would only include them if the death occurred after the  
249 end of the primary occasion. Finally, the gender of a single individual born in 2012 was not determined, and  
250 as such that bear was excluded from our analyses. These factors put together account for the differences with  
251 the counts performed by the GSTOP.

## 252 5. Implications for bear abundance estimates

253 Even though different methods are used to estimate brown bear population size such as distance sampling  
254 and capture-recapture methods (Solberg et al. 2006), once the analyses are performed, most brown bear  
255 populations over the world are described by their total number of individuals, whether it is in Italy (Gervasi  
256 et al. 2008), in Sweden (Kindberg et al. 2011) or in the USA (Boulanger et al. 2008). Some other carnivore  
257 populations, however, are described with different indicators, such as the number of potential family groups  
258 (Andren et al. 2002) or the number of females with cubs of the year (Palomero et al. 2007). Considering the  
259 importance of the minimum population size for its viability (Shaffer 1981), we suggest that in complement to  
260 the minimal population size used by the GSTOP to describe the Pyrenean brown bears, it is important to  
261 develop an alternate counting method, especially since the heavy inbreeding (Camarra et al. 2015; Chapron  
262 et al. 2009) means that the genetic effective size (Palstra and Ruzzante 2008) of the Pyrenean brown bear  
263 population is lower than the “real” population size would let us to believe. Brown bear females in Europe  
264 (Swenson et al. 2007) usually start reproducing at the age of 4 or 5 with an interbirth interval of 2 years at  
265 least (Schwartz et al. 2003). Therefore, we suggest also describing the population by using the number of  
266 females with cubs of the year (Palomero et al. 2007) or the total number of 4+ years old females in the  
267 population, instead of limiting ourselves to the total number of bears. This would give a much more accurate  
268 insight of the viability of the population, which is an important tool to use when dealing with the  
269 conservation of endangered populations (Beissinger and Westphal 1998).

## 270 6. Importance of transboundary management

271 A transboundary management strategy helps to avoid significant errors in the estimates, most importantly the  
272 overestimation that occurs when a single individual is accounted for in one or more political jurisdiction due

273 to its mobility(Bischof et al. 2016). The sum of yearly abundance in France and Spain was always larger than  
274 abundance from the Combined dataset, hence confirming this assumption. Even though administrative  
275 borders might coincide with a difference in local priorities (Moilanen and Arponen 2011), such as the  
276 Scandinavian lynx (*Lynx lynx*) population which is much more heavily hunted in Norway than it is in  
277 Sweden (Swenson and Andrén 2005),a transboundary approach allows for more biologically logical  
278 management (Linnell and Boitani 2012). Differing management policies between two neighboring  
279 jurisdictions can have consequences on a large carnivore population, e.g. by creating source/sink dynamics  
280 (Swenson and Andrén 2005)that will in turn affect demography (Robinson et al. 2008). Here, we showed that  
281 it was possible to build a transborder model despite differences in monitoring methods between the different  
282 jurisdictions.

### 283 **Conclusion**

284 Perceived errors in abundance estimates might lead to skepticism towards the results provided by scientists,  
285 which can be followed by a negative evolution of a conservation conflict (Redpath et al. 2013). While  
286 accurate scientific data is not sufficient to solve the contention surrounding some large carnivore  
287 populations, it is a necessary step to advance towards mitigating conflicts by allowing the identification of  
288 human and ecological impacts (Redpath et al. 2013). It is especially important in the case of the Pyrenean  
289 brown bear, where the recent relocation of a male Slovenian bear in Catalonia could lead to an increase of  
290 the conflict, playing on the attitude differences between Pyrenean residents (Piédallu et al. 2016). In this  
291 context, reliable scientific data will be needed to avoid widening the gap between supporters and opponents  
292 of bear presence in the French-Spanish mountains. As large carnivore populations recover in Europe  
293 (Chapron et al. 2014), transboundary monitoring, however complex it might be (Kark et al. 2015),could  
294 become an essential first step towards harmonious and efficient transboundary management(Bischof et al.  
295 2016; Kark et al. 2015), as it will be easier to implement than transboundary policies(Kark et al. 2015), and  
296 could facilitate the development of efficient solutions to ingrained conservation conflicts (Redpath et al.  
297 2013).

298 **Tables & Figures**

299 **Table 1: Number of bear tracks found yearly**

|        |          | 2008 | 2009 | 2010 | 2011 | 2012 | 2013 | 2014 | Total | %Total<br>Tracks | %ID'd Tracks |
|--------|----------|------|------|------|------|------|------|------|-------|------------------|--------------|
|        | All year | 99   | 58   | 159  | 189  | 228  | 203  | 162  | 1098  | 22.80%           | 74.34%       |
| France | May-Sep  | 80   | 52   | 123  | 130  | 157  | 161  | 121  | 824   | 17.11%           | 55.79%       |
|        | Apr-Nov  | 94   | 56   | 154  | 178  | 208  | 199  | 147  | 1036  | 21.52%           | 70.14%       |
|        | All year | 37   | 54   | 90   | 145  | 101  | 48   | 93   | 568   | 21.02%           | 63.18%       |
| Spain  | May-Sep  | 24   | 41   | 65   | 124  | 66   | 29   | 77   | 426   | 15.77%           | 47.39%       |
|        | Apr-Nov  | 36   | 51   | 80   | 142  | 101  | 48   | 91   | 549   | 20.32%           | 61.07%       |
|        | All year | 136  | 112  | 249  | 334  | 329  | 251  | 255  | 1666  | 22.16%           | 70.12%       |
| Total  | May-Sep  | 104  | 93   | 188  | 254  | 223  | 190  | 198  | 1250  | 16.63%           | 52.61%       |
|        | Apr-Nov  | 130  | 107  | 234  | 320  | 309  | 247  | 238  | 1585  | 21.09%           | 66.71%       |

300

301 Number of bear tracks per primary occasion of capture/Year. Two sets of secondary occasions are depicted:

302 May-Sep (from May to September) and Apr-Nov (from April to November). The Total and Identified

303 number of tracks in each dataset are shown in Table 1 of the Appendix section.

304

305 **Table 2: Model selection for each of the three datasets**

| <b>(a) France</b>   |           |           |            |      |       |        |          |
|---------------------|-----------|-----------|------------|------|-------|--------|----------|
| #                   | Survival  | Detection | Emigration | npar | AICc  | Weight | Deviance |
| 6                   | 0         | Sex + Mix | None       | 12   | 649.3 | 0.27   | 636.1    |
| 30                  | 0         | Sex + Mix | Markovian  | 14   | 650.2 | 0.17   | 632.4    |
| 54                  | 0         | Sex + Mix | Random     | 13   | 651.1 | 0.11   | 635.6    |
| 12                  | Sex       | Sex + Mix | None       | 13   | 651.2 | 0.10   | 635.7    |
| 28                  | 0         | Mix       | Markovian  | 13   | 651.6 | 0.08   | 636.1    |
| 4                   | 0         | Mix       | None       | 11   | 652.7 | 0.05   | 641.7    |
| 60                  | Sex       | Sex + Mix | Random     | 14   | 653.1 | 0.04   | 635.3    |
| 34                  | Sex       | Mix       | Markovien  | 14   | 653.5 | 0.03   | 635.7    |
| 52                  | 0         | Mix       | Random     | 12   | 653.8 | 0.03   | 640.6    |
| 10                  | Sex       | Mix       | None       | 12   | 654.5 | 0.02   | 641.2    |
| 26                  | 0         | Sex       | Markovian  | 12   | 655.4 | 0.01   | 642.2    |
| 18                  | Age       | Sex + Mix | None       | 19   | 655.5 | 0.01   | 625.9    |
| 58                  | Sex       | Mix       | Random     | 13   | 655.6 | 0.01   | 640.2    |
| 36                  | Sex       | Sex + Mix | Markovian  | 15   | 655.8 | 0.01   | 635.7    |
| <b>(b) Spain</b>    |           |           |            |      |       |        |          |
| #                   | Survival  | Detection | Emigration | npar | AICc  | Weight | Deviance |
| 49                  | 0         | 0         | Random     | 10   | 447.8 | 0.25   | 420.9    |
| 50                  | 0         | Sex       | Random     | 11   | 448.1 | 0.21   | 418.9    |
| 55                  | Sex       | 0         | Random     | 11   | 449.6 | 0.10   | 420.3    |
| 56                  | Sex       | Sex       | Random     | 12   | 450.0 | 0.08   | 418.4    |
| 25                  | 0         | 0         | Markovian  | 11   | 450.1 | 0.08   | 420.8    |
| 26                  | 0         | Sex       | Markovian  | 12   | 450.5 | 0.07   | 418.8    |
| 52                  | 0         | Mix       | Random     | 12   | 451.4 | 0.04   | 419.7    |
| 31                  | Sex       | 0         | Markovian  | 12   | 451.9 | 0.03   | 420.3    |
| 54                  | 0         | Sex + Mix | Random     | 13   | 452.3 | 0.03   | 418.2    |
| 32                  | Sex       | Sex       | Markovian  | 13   | 452.4 | 0.03   | 418.3    |
| 58                  | Sex       | Mix       | Random     | 13   | 453.3 | 0.02   | 419.2    |
| 28                  | 0         | Mix       | Markovian  | 13   | 453.7 | 0.01   | 419.7    |
| <b>(c) Combined</b> |           |           |            |      |       |        |          |
| #                   | Survival  | Detection | Emigration | npar | AICc  | Weight | Deviance |
| 12                  | Sex       | Sex + Mix | None       | 13   | 725.0 | 0.21   | 724.5    |
| 6                   | 0         | Sex + Mix | None       | 12   | 725.2 | 0.19   | 726.9    |
| 58                  | Sex       | Mix       | Random     | 13   | 726.2 | 0.11   | 725.8    |
| 52                  | 0         | Mix       | Random     | 12   | 726.4 | 0.10   | 728.1    |
| 18                  | Age       | Sex + Mix | None       | 19   | 727.6 | 0.06   | 713.6    |
| 72                  | Sex + Age | Sex + Mix | Random     | 21   | 727.8 | 0.05   | 709.1    |
| 34                  | Sex       | Mix       | Markovian  | 14   | 728.4 | 0.04   | 725.8    |
| 28                  | 0         | Mix       | Markovian  | 13   | 728.5 | 0.04   | 728.1    |
| 24                  | Sex + Age | Sex + Mix | None       | 20   | 728.6 | 0.03   | 712.3    |
| 10                  | Sex       | Mix       | None       | 12   | 728.9 | 0.03   | 730.7    |
| 64                  | Age       | Mix       | Random     | 19   | 729.2 | 0.02   | 715.3    |
| 4                   | 0         | Mix       | None       | 11   | 729.4 | 0.02   | 733.3    |
| 36                  | Sex       | Sex + Mix | Markovian  | 15   | 729.4 | 0.02   | 724.5    |
| 30                  | 0         | Sex + Mix | Markovian  | 14   | 729.6 | 0.02   | 726.9    |
| 70                  | Sex + Age | Mix       | Random     | 20   | 730.2 | 0.02   | 713.9    |

306

307 List of the best models (Weight > 0.01) selected for each one of the three datasets ((a) France (b) Spain (c)

308 Total). #: Number of the model. Survival, Detection, Emigration: effects tested on each parameter in the

309 model. 0: No effect on the parameter. npar: number of parameters. Note: whenever model averaging was

310 impossible due to the different nature of the models (with or without a mixture effect), we only selected the  
311 category with the highest combined weight.

312 **Table 3: Model-averaged parameter estimates**

| Dataset | Bear Class     | Survival    | Detection   | Emigration  | Immigration |
|---------|----------------|-------------|-------------|-------------|-------------|
| France  | Female class 1 | 0.90 ± 0.07 | 0.84 ± 0.13 | 0.08 ± 0.08 | 0.50 ± 0.46 |
|         | Female class 2 |             | 0.36 ± 0.05 |             |             |
|         | Male class 1   | 0.92 ± 0.06 | 0.88 ± 0.10 |             |             |
|         | Male class 2   |             | 0.45 ± 0.06 |             |             |
| Spain   | Female         | 0.83 ± 0.06 | 0.48 ± 0.04 | 0.27 ± 0.09 | 0.25 ± 0.14 |
|         | Male           | 0.85 ± 0.07 | 0.52 ± 0.04 |             |             |
| Total   | Female class 1 | 0.88 ± 0.05 | 0.73 ± 0.13 | 0.07 ± 0.05 | 0.10 ± 0.14 |
|         | Female class 2 |             | 0.32 ± 0.05 |             |             |
|         | Male class 1   | 0.93 ± 0.04 | 0.81 ± 0.05 |             |             |
|         | Male class 2   |             | 0.41 ± 0.06 |             |             |

313

314 Model-averaged parameter estimates for each of the datasets. Bear Class represents the different individual

315 classes identified by the mixture effect.

316



317 **Fig. 1: Map of bear monitoring in the French and Spanish Pyrenees**

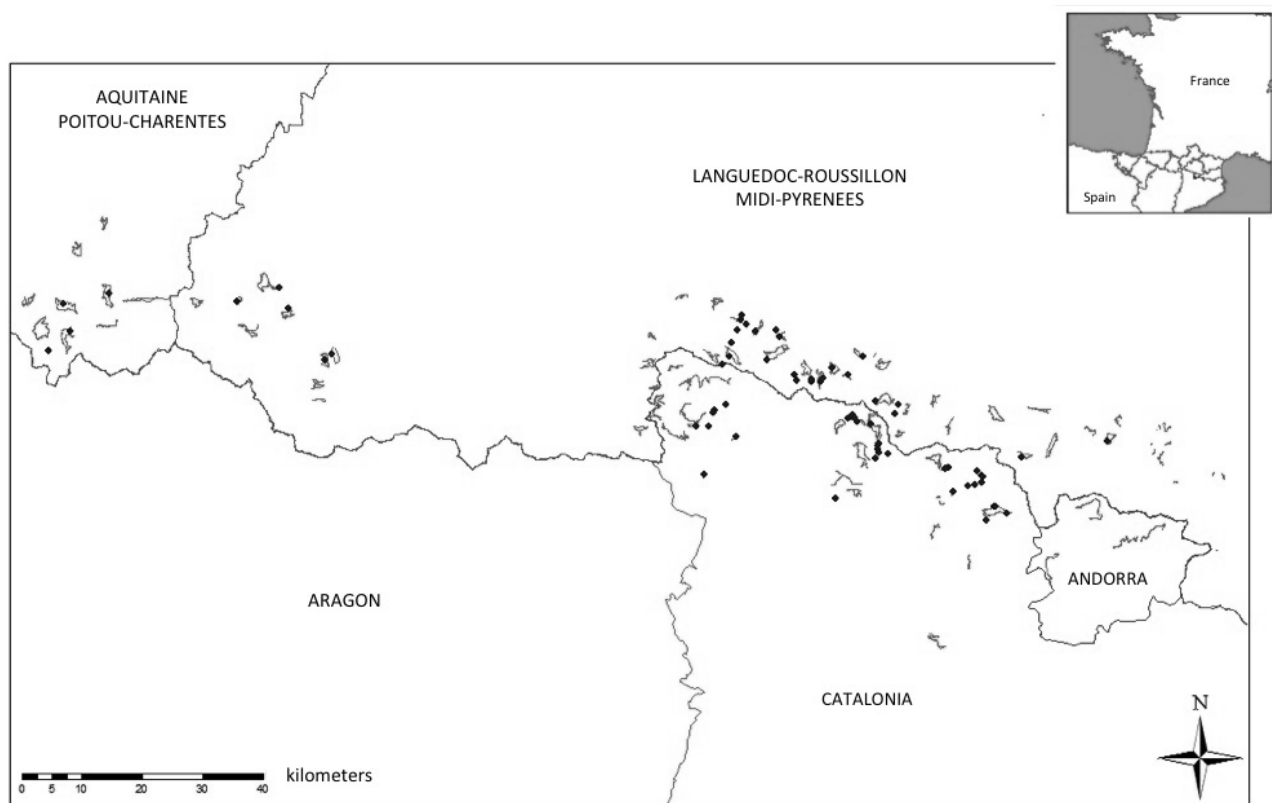

318  
319 Bear monitoring in the French and Spanish Pyrenees. Thin lines: systematic itineraries. Dots: camera traps.  
320 The top-right mini-map indicates French counties and Spanish province – only the westernmost French  
321 county is part of the Aquitaine-Poitou-Charentes region, all the others are part of the Languedoc-Roussillon-  
322 Midi-Pyrénées region. In France, data monitoring is handled by the Game and Wildlife Agency. In Spain,  
323 monitoring is handled separately between the three Autonomous communities: in Catalonia, the Fauna and  
324 Flora Service of the Department of Territory and Sustainability is in charge with a local delegation to the  
325 General Council in the Val d’Aran; in Aragon, it is the Environmental Services Department that oversees  
326 bear management, and in Navarre, it is the Public Society for Environmental Management of Navarre. In  
327 Andorra, monitoring is handled by the Natural Heritage Department.

328 **Figure 2: Population size estimation for each dataset**

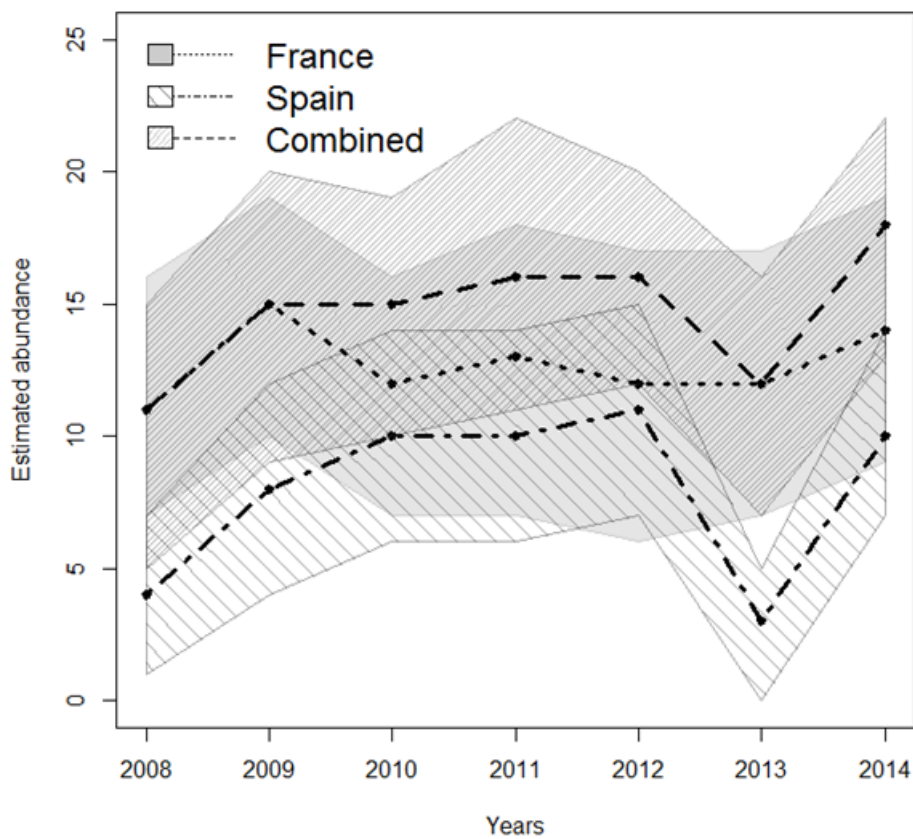

329

330 Population size for the Pyrenean brown bears between 2008 and 2014 estimated using the three different  
331 datasets (France only, Spain only, and Combined).

332 **References**

- 333 Andren H et al. (2002) Estimating total lynx *Lynx lynx* population size from censuses of family groups  
334 *Wildlife Biology* 8:299-306
- 335 Beissinger SR, Westphal I (1998) On the use of demographic models of population viability in endangered  
336 species management *Journal of Wildlife Management* 62:821-841
- 337 Bischof R, Brøseth H, Gimenez O (2016) Wildlife in a Politically Divided World: Insularism Inflates  
338 Estimates of Brown Bear Abundance *Conservation Letters* 9:122-130 doi:10.1111/conl.12183
- 339 Bischof R, Swenson JE (2012) Linking noninvasive genetic sampling and traditional monitoring to aid  
340 management of a trans-border carnivore population *Ecological Applications* 22:361-373
- 341 Boulanger J, Kendall KC, Stetz JB, Roon DA, Waits LP, Paetkau D (2008) Multiple Data Sources Improve  
342 DNA-Based Mark-Recapture Population Estimates Of Grizzly Bears *Ecological Applications*  
343 18:577-589
- 344 Buckland ST, Burnham KP, Augustin NH (1997) Model Selection: An Integral Part of Inference *Biometrics*  
345 53:603-618
- 346 Bull J, Nilsen EB, Mysterud A, Milner-Gulland EJ (2009) Survival on the Border: A Population Model to  
347 Evaluate Management Options for Norway's Wolves *Canis lupus* *Wildlife Biology* 15:412-424  
348 doi:10.2981/08-010
- 349 Bunnell FL, Tait DEN (1985) Mortality Rates of North American Bears *Arctic* 38:316-323
- 350 Burnham KP, Anderson DR (2002) *Model Selection and Multimodel Inference: A Practical Information-*  
351 *Theoretic Approach*, 2nd Edition. Springer-Verlag, New York
- 352 Camarra JJ, Sentilles J, Bombillon N, Gastineau A, Quenette PY (2015) *Suivi de l'ours brun dans les*  
353 *Pyrénées françaises (Sous-populations occidentale et centrale) - Rapport annuel, Année 2015*. Office  
354 National de la Chasse et de la Faune Sauvage,
- 355 Chapron G, Gimenez O, Quenette P-Y (2010) Demographic parameters and viability of the Pyrenean brown  
356 bear population.
- 357 Chapron G et al. (2014) Recovery of large carnivores in Europe's modern human-dominated landscapes  
358 *Science* 346:1517-1519 doi:10.1126/science.1257553

- 359 Chapron G, Wielgus R, Quenette PY, Camarra JJ (2009) Diagnosing mechanisms of decline and planning  
360 for recovery of an endangered brown bear (*Ursus arctos*) population *PloS one* 4:e7568  
361 doi:10.1371/journal.pone.0007568
- 362 Cubaynes S et al. (2010) Importance of accounting for detection heterogeneity when estimating abundance:  
363 the case of French wolves *Conservation biology : the journal of the Society for Conservation*  
364 *Biology* 24:621-626 doi:10.1111/j.1523-1739.2009.01431.x
- 365 De Barba M, Waits LP, Garton EO, Genovesi P, Randi E, Mustoni A, Groff C (2010) The power of genetic  
366 monitoring for studying demography, ecology and genetics of a reintroduced brown bear population  
367 *Mol Ecol* 19:3938-3951 doi:10.1111/j.1365-294X.2010.04791.x
- 368 Fagen R, Fagen JM (1996) Individual Distinctiveness in Brown Bears, *Ursus arctos* *L Ethology* 102:212-226  
369 doi:10.1111/j.1439-0310.1996.tb01119.x
- 370 Garshelis DL, Gibeau M, Herrero S (2005) Grizzly bear demographics in and around Banff National Park  
371 and Kananaskis Country, *Alberta Journal of Wildlife Management* 69:277-297
- 372 Gervasi V, Brøseth H, Nilsen EB, Ellegren H, Flagstad Ø, Linnell JDC (2015) Compensatory immigration  
373 counteracts contrasting conservation strategies of wolverines (*Gulo gulo*) within Scandinavia  
374 *Biological Conservation* 191:632-639 doi:10.1016/j.biocon.2015.07.024
- 375 Gervasi V et al. (2008) A preliminary estimate of the Apennine brown bear population size based on hair-  
376 snag sampling and multiple data source mark–recapture Huggins models *Ursus* 19:105-121
- 377 Gervasi V, Ciucci P, Boulanger J, Randi E, Boitani L (2012) A multiple data source approach to improve  
378 abundance estimates of small populations: The brown bear in the Apennines, Italy *Biological*  
379 *Conservation* 152:10-20 doi:10.1016/j.biocon.2012.04.005
- 380 Gittleman JL, Harvey PH (1982) Carnivore Home-Range Size, Metabolic Needs and Ecology Behavioral  
381 *Ecology and Sociobiology* 10:57-63
- 382 Hirata D et al. (2013) Molecular phylogeography of the brown bear (*Ursus arctos*) in Northeastern Asia  
383 based on analyses of complete mitochondrial DNA sequences *Molecular biology and evolution*  
384 30:1644-1652 doi:10.1093/molbev/mst077
- 385 Kark S, Tulloch A, Gordon A, Mazar T, Bunnefeld N, Levin N (2015) Cross-boundary collaboration: key to  
386 the conservation puzzle *Current Opinion in Environmental Sustainability* 12:12-24  
387 doi:10.1016/j.cosust.2014.08.005

- 388 Kendall WL, Nichols JD, Hines JE (1997) Estimating Temporary Emigration Using Capture-Recapture Data  
389 With Pollock's Robust Design *Ecology* 78:563-578
- 390 Kindberg J, Swenson JE, Ericsson G, Bellemain E, Miquel C, Taberlet P (2011) Estimating population size  
391 and trends of the Swedish brown bear *Ursus arctos* population *Wildlife Biology* 17:114-123  
392 doi:10.2981/10-100
- 393 Laake JL (2013) RMark: An R Interface For Analysis Of Capture-Recapture Data With MARK. Alaska  
394 Fisheries Science Center,
- 395 Linnell JD, Salvatori V, Boitani L (2008) Guidelines for Population Level Management Plans for Large  
396 Carnivores. European Commission,
- 397 Linnell JDC, Boitani L (2012) Building biological realism into wolf management policy: the development of  
398 the population approach in Europe *Hystrix, the Italian Journal of Mammalogy* 23:80-91  
399 doi:10.4404/hystrix-23.1-4676
- 400 Mattisson J et al. (2013) Home range size variation in a recovering wolf population: evaluating the effect of  
401 environmental, demographic, and social factors *Oecologia* 173:813-825 doi:10.1007/s00442-013-  
402 2668-x
- 403 McDonald LL (2004) Sampling rare populations. In: Thompson WL (ed) *Sampling Rare and Elusive*  
404 *Species*. Island Press, Washington, DC, pp 11-42
- 405 McLellan B et al. (1999) Rates and Causes of Grizzly Bear Mortality in the Interior Mountains of British  
406 Columbia, Alberta, Montana, Washington and Idaho *Journal of Wildlife Management* 63:911-920  
407 doi:10.2307/3802805
- 408 McLoughlin PD, Ferguson SH, Messier F (2000) Intraspecific Variation in Home Range Overlap with  
409 Habitat Quality: A Comparison among Brown Bear Populations *Evolutionary Ecology* 14:39-60  
410 doi:10.1023/a:1011019031766
- 411 Miquel C, Bellemain E, Poillot C, BessiÈRe J, Durand A, Taberlet P (2006) Quality indexes to assess the  
412 reliability of genotypes in studies using noninvasive sampling and multiple-tube approach *Molecular*  
413 *Ecology Notes* 6:985-988 doi:10.1111/j.1471-8286.2006.01413.x
- 414 Moilanen A, Arponen A (2011) Administrative regions in conservation: Balancing local priorities with  
415 regional to global preferences in spatial planning *Biological Conservation* 144:1719-1725  
416 doi:10.1016/j.biocon.2011.03.007

- 417 Nilsen EB, Herfindal I, Linnell JDC (2005) Can intra-specific variation in carnivore home-range size be  
418 explained using remote-sensing estimates of environmental productivity? *Ecoscience* 12:68-75  
419 doi:10.2980/i1195-6860-12-1-68.1
- 420 Palomero G, Ballesteros F, Nores C, Blanco JC, Herrero J, Garcia-Serrano A (2007) Trends in number and  
421 distribution of brown bear females with cubs-of-the-year in the Cantabrian Mountains, Spain *Ursus*  
422 18:145-157
- 423 Palstra FP, Ruzzante DE (2008) Genetic estimates of contemporary effective population size: what can they  
424 tell us about the importance of genetic stochasticity for wild population persistence? *Molecular*  
425 *Ecology* 17:3428-3447 doi:10.1111/j.1365-294X.2008.03842.x
- 426 Piédallu B et al. (2016) Spatial variation in public attitudes towards brown bears in the French Pyrenees  
427 *Biological Conservation* 197:90-97 doi:10.1016/j.biocon.2016.02.027
- 428 RCoreTeam (2013) R: A Language and Environment for Statistical Computing. R Foundation for Statistical  
429 Computing,
- 430 Redpath SM et al. (2013) Understanding and managing conservation conflicts *Trends in ecology & evolution*  
431 28:100-109 doi:10.1016/j.tree.2012.08.021
- 432 Robinson HS, Wielgus R, Cooley HS, Cooley SW (2008) Sink Populations in Carnivore Management:  
433 Cougar Demography and Immigration in a Hunted Population *Ecological Applications* 18:1028-  
434 1037
- 435 Schwartz CC et al. (2003) Reproductive maturation and senescence in the female brown bear *Ursus* 14:109-  
436 119
- 437 Shaffer ML (1981) Minimum Population Sizes for Species Conservation *BioScience* 31:131-134
- 438 Smith HC, Pollock K, Waples K, Bradley S, Bejder L (2013) Use of the robust design to estimate seasonal  
439 abundance and demographic parameters of a coastal bottlenose dolphin (*Tursiops aduncus*)  
440 population *PloS one* 8:e76574 doi:10.1371/journal.pone.0076574
- 441 Solberg KH, Bellemain E, Drageset O-M, Taberlet P, Swenson JE (2006) An evaluation of field and non-  
442 invasive genetic methods to estimate brown bear (*Ursus arctos*) population size *Biological*  
443 *Conservation* 128:158-168 doi:10.1016/j.biocon.2005.09.025
- 444 Swenson JE, Adamic M, Huber D, Stokke S (2007) Brown bear body mass and growth in northern and  
445 southern Europe *Oecologia* 153:37-47 doi:10.1007/s00442-007-0715-1

- 446 Swenson JE, Andrén H (2005) A tale of two countries: large carnivore depredation and compensation  
447 schemes in Sweden and Norway. In: Woodroffe R, Thirgood S, Rabinowitz A (eds) People and  
448 Wildlife, Conflict or Co-existence? Cambridge University Press, pp 323-339
- 449 Swenson JE, Taberlet P, Bellemain E (2011) Genetics and conservation of European brown bears *Ursus*  
450 *arctos* Mammal Review 41:87-98 doi:10.1111/j.1365-2907.2010.00179.x
- 451 Taberlet P et al. (1997) Noninvasive genetic tracking of the endangered Pyrenean brown bear population  
452 Molecular Ecology 6:869-876
- 453 Trouwborst A (2010) Managing the Carnivore Comeback: International and EU Species Protection Law and  
454 the Return of Lynx, Wolf and Bear to Western Europe Journal of Environmental Law 22:347-372  
455 doi:10.1093/jel/eqq013
- 456 Waits LP, Talbot SL, Ward RH, Shields GF (1998) Mitochondrial DNA Phylogeography of the North  
457 American Brown Bear and Implications for Conservation Conservation Biology 12:408-417  
458 doi:10.1111/j.1523-1739.1998.96351.x
- 459 White GC, Burnham KP (1999) Program MARK: survival estimation from populations of marked animals  
460 Bird Study 46:S120-S139 doi:10.1080/00063659909477239
- 461 Wielgus R, Bunnell FL (1994) Dynamics of a small, hunted Brown Bear *Ursus Arctos* population in  
462 Southwestern Alberta, Canada Biological Conservation 67:161-166
- 463
- 464
